# Supplementary material
Source: PubMed Central journal article supplement (PMC7931815)

## Evaluating Short-term Forecasting among Different Epidemiological Models under a Bayesian Framework --Manuscript Draft--

|                                                      |                                                                                                                                                                                                                                                                                                                                                                                                                                                                                                                                                                                                                                                                                                                                                                                                                                                                                                                                                                            |
|------------------------------------------------------|----------------------------------------------------------------------------------------------------------------------------------------------------------------------------------------------------------------------------------------------------------------------------------------------------------------------------------------------------------------------------------------------------------------------------------------------------------------------------------------------------------------------------------------------------------------------------------------------------------------------------------------------------------------------------------------------------------------------------------------------------------------------------------------------------------------------------------------------------------------------------------------------------------------------------------------------------------------------------|
| <b>Manuscript Number:</b>                            | GIGA-D-20-00328R1                                                                                                                                                                                                                                                                                                                                                                                                                                                                                                                                                                                                                                                                                                                                                                                                                                                                                                                                                          |
| <b>Full Title:</b>                                   | Evaluating Short-term Forecasting among Different Epidemiological Models under a Bayesian Framework                                                                                                                                                                                                                                                                                                                                                                                                                                                                                                                                                                                                                                                                                                                                                                                                                                                                        |
| <b>Article Type:</b>                                 | Research                                                                                                                                                                                                                                                                                                                                                                                                                                                                                                                                                                                                                                                                                                                                                                                                                                                                                                                                                                   |
| <b>Funding Information:</b>                          |                                                                                                                                                                                                                                                                                                                                                                                                                                                                                                                                                                                                                                                                                                                                                                                                                                                                                                                                                                            |
| <b>Abstract:</b>                                     | Forecasting of COVID-19 cases daily and weekly has been one of the challenges posed to governments and the health sector globally. To facilitate informed public health decisions, the concerned parties rely on short-term daily projections generated via predictive modeling. We calibrate stochastic variants of growth models and the standard SIR model into one Bayesian framework to evaluate and compare their short-term forecasts. We implement rolling-origin cross-validation to compare the short-term forecasting performance of the stochastic epidemiological models and an autoregressive moving average model across 20 countries that had the most confirmed COVID-19 cases as of August 22, 2020. None of the models proved to be a gold standard across all regions, while all outperformed the autoregressive moving average model in terms of the accuracy of forecast and interpretability.                                                       |
| <b>Corresponding Author:</b>                         | Qiwei Li, Ph.D.<br>University of Texas at Dallas<br>Richardson, TX UNITED STATES                                                                                                                                                                                                                                                                                                                                                                                                                                                                                                                                                                                                                                                                                                                                                                                                                                                                                           |
| <b>Corresponding Author Secondary Information:</b>   |                                                                                                                                                                                                                                                                                                                                                                                                                                                                                                                                                                                                                                                                                                                                                                                                                                                                                                                                                                            |
| <b>Corresponding Author's Institution:</b>           | University of Texas at Dallas                                                                                                                                                                                                                                                                                                                                                                                                                                                                                                                                                                                                                                                                                                                                                                                                                                                                                                                                              |
| <b>Corresponding Author's Secondary Institution:</b> |                                                                                                                                                                                                                                                                                                                                                                                                                                                                                                                                                                                                                                                                                                                                                                                                                                                                                                                                                                            |
| <b>First Author:</b>                                 | Qiwei Li, Ph.D.                                                                                                                                                                                                                                                                                                                                                                                                                                                                                                                                                                                                                                                                                                                                                                                                                                                                                                                                                            |
| <b>First Author Secondary Information:</b>           |                                                                                                                                                                                                                                                                                                                                                                                                                                                                                                                                                                                                                                                                                                                                                                                                                                                                                                                                                                            |
| <b>Order of Authors:</b>                             | Qiwei Li, Ph.D.<br>Tejasv Bedi<br>Christoph U. Lehmann, M.D.<br>Guanghua Xiao, Ph.D.<br>Yang Xie, Ph.D., M.D.                                                                                                                                                                                                                                                                                                                                                                                                                                                                                                                                                                                                                                                                                                                                                                                                                                                              |
| <b>Order of Authors Secondary Information:</b>       |                                                                                                                                                                                                                                                                                                                                                                                                                                                                                                                                                                                                                                                                                                                                                                                                                                                                                                                                                                            |
| <b>Response to Reviewers:</b>                        | <p>For a clean version of the response letter, please see the pdf file uploaded as the supplementary material.</p> <p>We want to thank the editor and the two reviewers for this opportunity to revise our work. Based on the comments, we have performed a minor revision. The reviewers' comments have greatly helped us to improve the paper. We hope that the revised paper is now acceptable for publication in GigaScience. Below, we respond to each reviewer's points. All changes in the text of the paper have been highlighted in red.</p> <p>Editor Comment 1: Please register any new software application in the bio.tools and SciCrunch.org databases to receive biotoolsID identifiers and Research Resource Identification Initiative ID (RRID) and include these in your manuscript. This will facilitate tracking, reproducibility and re-use of your tool.</p> <p>Response: We have registered both the web application and source code associated</p> |

|                                                                                                                                 |                                                                                                                                                                                                                                                                                                                                                                                                                                                                                                                                                                                                                                                                                                                                                                                                                                                                                                                                                                                                                                                                                                                                                                                                                                                                                                                                                                                                                                                                                                                                                                                                                                                                                                                                                                                                                                                                                                                                                                                                                                                                                                                                                                                                                                                                                                                                                                                                                                                                                                                                                                                                                                                                                                                                                                                                                                                                                                                                                                                                                                                                                                    |
|---------------------------------------------------------------------------------------------------------------------------------|----------------------------------------------------------------------------------------------------------------------------------------------------------------------------------------------------------------------------------------------------------------------------------------------------------------------------------------------------------------------------------------------------------------------------------------------------------------------------------------------------------------------------------------------------------------------------------------------------------------------------------------------------------------------------------------------------------------------------------------------------------------------------------------------------------------------------------------------------------------------------------------------------------------------------------------------------------------------------------------------------------------------------------------------------------------------------------------------------------------------------------------------------------------------------------------------------------------------------------------------------------------------------------------------------------------------------------------------------------------------------------------------------------------------------------------------------------------------------------------------------------------------------------------------------------------------------------------------------------------------------------------------------------------------------------------------------------------------------------------------------------------------------------------------------------------------------------------------------------------------------------------------------------------------------------------------------------------------------------------------------------------------------------------------------------------------------------------------------------------------------------------------------------------------------------------------------------------------------------------------------------------------------------------------------------------------------------------------------------------------------------------------------------------------------------------------------------------------------------------------------------------------------------------------------------------------------------------------------------------------------------------------------------------------------------------------------------------------------------------------------------------------------------------------------------------------------------------------------------------------------------------------------------------------------------------------------------------------------------------------------------------------------------------------------------------------------------------------------|
|                                                                                                                                 | <p>with the paper in the bio.tools and SciCrunch.org databases and included these in the Software and Availability of source code and requirement sections on page 9.</p> <p>Editor Comment 2: Please include other identifiers in the paper such as ORCID details of any authors that have them.</p> <p>Response: The ORCID of Qiwei Li is 0000-0002-1020-3050, the ORCID of Tejasv Bedi is 0000- 0001-7532-4075, the ORCID of Christoph Lehmann is 0000-0001-9559-4646, the ORCID of Guanghai Xiao is 0000-0001-9387-9883, and the ORCID of Yang Xie is 0000-0001-9456-1762. We will update this information in the submission system.</p> <p>Reviewer 1 Comment 1: Please, explain better the equation of sMAPE in Algorithm 1, defining all the variables (et, etc.).</p> <p>Response: We are sorry for any confusion regarding the definition of sMAPE. We have rewritten the sMAPE in Algorithm 1 and enriched the Model comparison in the rolling-origin cross-validation section on page 3.</p> <p>Reviewer 1 Comment 2: Please, discuss something regarding the possible discretization of Equation (2), (3), or (4). Specifically, Equation (4) seems still in continuous time since there are derivatives and not differences. Please, clarify this point.</p> <p>Response: Thank you for the suggestion to clarify this point. As for Equation (2), we have given its discretized form right after the continuous case. As for Equation (3), the original version is already in discrete time. Thus, no change needs to be made. As for Equation (4), we have defined the notation as the forward difference operator to avoid any confusion with the derivative.</p> <p>Reviewer 1 Comment 3: Regarding the MCMC and Metropolis part, in order to improve the state-of-the-art discussion, I suggest to discuss more sophisticated versions of the MH algorithm, such as the Multiple Try Metropolis algorithms and adaptive MCMC schemes (see e.g. Mira et al., 2001Haario et al., 2006Martino, 2018Liang et al., 2011).</p> <p>Response: Thank you for your valuable suggestion. We have added a short discussion about several advanced versions of the Metropolis-Hastings algorithm that could potentially be used to improve our Markov chain Monte Carlo algorithms in the last paragraph of the Conclusion section on page 5.</p> <p>Reviewer 2 Comment 1: Rightfully they note that “none of the models proved to be golden standards across all the regions” and I should add also across time scales where definitely a second and possibly a third wave have already been observed to develop. Although the authors briefly mention this in their paper, I believe they should make it clearer why there is such a limitation for the models and their variants discussed herein.</p> <p>Response: Thank you for your valuable suggestion. We are currently extending our work to account for multiple peaks. We have added a short discussion about the limitation of the single-peak-based modeling work in the last paragraph of the Conclusion section on page 5.</p> |
| <b>Additional Information:</b>                                                                                                  |                                                                                                                                                                                                                                                                                                                                                                                                                                                                                                                                                                                                                                                                                                                                                                                                                                                                                                                                                                                                                                                                                                                                                                                                                                                                                                                                                                                                                                                                                                                                                                                                                                                                                                                                                                                                                                                                                                                                                                                                                                                                                                                                                                                                                                                                                                                                                                                                                                                                                                                                                                                                                                                                                                                                                                                                                                                                                                                                                                                                                                                                                                    |
| <b>Question</b>                                                                                                                 | <b>Response</b>                                                                                                                                                                                                                                                                                                                                                                                                                                                                                                                                                                                                                                                                                                                                                                                                                                                                                                                                                                                                                                                                                                                                                                                                                                                                                                                                                                                                                                                                                                                                                                                                                                                                                                                                                                                                                                                                                                                                                                                                                                                                                                                                                                                                                                                                                                                                                                                                                                                                                                                                                                                                                                                                                                                                                                                                                                                                                                                                                                                                                                                                                    |
| Are you submitting this manuscript to a special series or article collection?                                                   | No                                                                                                                                                                                                                                                                                                                                                                                                                                                                                                                                                                                                                                                                                                                                                                                                                                                                                                                                                                                                                                                                                                                                                                                                                                                                                                                                                                                                                                                                                                                                                                                                                                                                                                                                                                                                                                                                                                                                                                                                                                                                                                                                                                                                                                                                                                                                                                                                                                                                                                                                                                                                                                                                                                                                                                                                                                                                                                                                                                                                                                                                                                 |
| <b>Experimental design and statistics</b>                                                                                       | Yes                                                                                                                                                                                                                                                                                                                                                                                                                                                                                                                                                                                                                                                                                                                                                                                                                                                                                                                                                                                                                                                                                                                                                                                                                                                                                                                                                                                                                                                                                                                                                                                                                                                                                                                                                                                                                                                                                                                                                                                                                                                                                                                                                                                                                                                                                                                                                                                                                                                                                                                                                                                                                                                                                                                                                                                                                                                                                                                                                                                                                                                                                                |
| Full details of the experimental design and statistical methods used should be given in the Methods section, as detailed in our |                                                                                                                                                                                                                                                                                                                                                                                                                                                                                                                                                                                                                                                                                                                                                                                                                                                                                                                                                                                                                                                                                                                                                                                                                                                                                                                                                                                                                                                                                                                                                                                                                                                                                                                                                                                                                                                                                                                                                                                                                                                                                                                                                                                                                                                                                                                                                                                                                                                                                                                                                                                                                                                                                                                                                                                                                                                                                                                                                                                                                                                                                                    |

|                                                                                                                                                                                                                                                                                                                                                                                                                                                                                                                                                         |            |
|---------------------------------------------------------------------------------------------------------------------------------------------------------------------------------------------------------------------------------------------------------------------------------------------------------------------------------------------------------------------------------------------------------------------------------------------------------------------------------------------------------------------------------------------------------|------------|
| <p><a href="#">Minimum Standards Reporting Checklist.</a></p> <p>Information essential to interpreting the data presented should be made available in the figure legends.</p> <p>Have you included all the information requested in your manuscript?</p>                                                                                                                                                                                                                                                                                                |            |
| <p><b>Resources</b></p> <p>A description of all resources used, including antibodies, cell lines, animals and software tools, with enough information to allow them to be uniquely identified, should be included in the Methods section. Authors are strongly encouraged to cite <a href="#">Research Resource Identifiers</a> (RRIDs) for antibodies, model organisms and tools, where possible.</p> <p>Have you included the information requested as detailed in our <a href="#">Minimum Standards Reporting Checklist</a>?</p>                     | <p>Yes</p> |
| <p><b>Availability of data and materials</b></p> <p>All datasets and code on which the conclusions of the paper rely must be either included in your submission or deposited in <a href="#">publicly available repositories</a> (where available and ethically appropriate), referencing such data using a unique identifier in the references and in the “Availability of Data and Materials” section of your manuscript.</p> <p>Have you have met the above requirement as detailed in our <a href="#">Minimum Standards Reporting Checklist</a>?</p> | <p>Yes</p> |

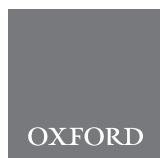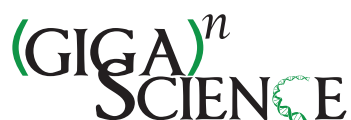

GigaScience, 2017, 1–11

doi: xx.xxxx/xxxx

Manuscript in Preparation  
Paper

PAPER

# Evaluating Short-term Forecasting among Different Epidemiological Models under a Bayesian Framework

Qiwei Li<sup>1,†,\*</sup>, Tejasv Bedi<sup>1,†</sup>, Christoph U. Lehmann<sup>2,3,4</sup>, Guanghua Xiao<sup>3,4</sup> and Yang Xie<sup>3,4</sup>

<sup>1</sup>Department of Mathematical Sciences, The University of Texas at Dallas, Richardson, TX 75080, USA and

<sup>2</sup>Department of Pediatrics, The University of Texas Southwestern Medical Center, Dallas, TX 75390, USA

and <sup>3</sup>Lyda Hill Department of Bioinformatics, The University of Texas Southwestern Medical Center, Dallas, TX 75390, USA and

<sup>4</sup>Department of Population and Data Sciences, The University of Texas Southwestern Medical Center, Dallas, TX 75390, USA

\*qiwei.li@utdallas.edu

†Contributed equally.

## Abstract

**Background:** Forecasting of COVID-19 cases daily and weekly has been one of the challenges posed to governments and the health sector globally. To facilitate informed public health decisions, the concerned parties rely on short-term daily projections generated via predictive modeling. We calibrate stochastic variants of growth models and the standard SIR model into one Bayesian framework to evaluate and compare their short-term forecasts. **Results:** We implement rolling-origin cross-validation to compare the short-term forecasting performance of the stochastic epidemiological models and an autoregressive moving average model across 20 countries that had the most confirmed COVID-19 cases as of August 22, 2020. **Conclusion:** None of the models proved to be a gold standard across all regions, while all outperformed the autoregressive moving average model in terms of the accuracy of forecast and interpretability.

**Key words:** COVID-19; SARS-CoV-2; Stochastic growth model; Stochastic SIR model; Time-series cross-validation.

## Background

COVID-19, a respiratory disease coronavirus SARS-CoV-2, rapidly caused an ongoing global pandemic. By October 2020, COVID-19 had become the third leading cause of death in the United States (U.S.) for individuals aged 45 – 84 years, and continues to spread quickly in most countries. Given the extent of health and economic distress caused by the pandemic, there is an urgent public health need to improve prediction of the spread of COVID-19 locally, nationally, and globally.

Since its emergence, a myriad of predictive modeling approaches have been proposed to forecast trends of COVID-19 disease to aid public health officials in developing effective poli-

cies and measures to suppress spread and minimize casualties. Five general approaches to forecast new cases or expected combined mortality linked to COVID-19 exist: 1) Time-series forecasting like autoregressive integrated moving average (ARIMA) [1, 2]; 2) Growth curve fitting based on the generalized Richards curve (GRC) or its special cases [3, 4, 5, 6, 7]; 3) Compartmental modeling based on the susceptible-infectious-removed (SIR) models or their derivations [8, 9, 10, 11, 12, 13, 14, 15, 16, 17, 18]; 4) Agent-based modeling [19]; and 5) Artificial intelligence (AI)-inspired modeling [20, 21, 22, 23].

Each approach, whether deterministic or stochastic, has its own strengths. For example, the ARIMA model combines the

Compiled on: January 11, 2021.

Draft manuscript prepared by the author.

regressive process and the moving average allowing prediction of a given time series by considering its own lags and lagged forecast error. Curve fitting approaches (also known as phenomenological modeling) fit a curve to the observed number of cumulative confirmed cases or deaths with a certain error structure (e.g. Gaussian or Poisson), enabling meaningful interpretation through curve parameters while accounting for measurement errors. Compartmental modeling (also known as mechanistic modeling) assigns partitions of the population to compartments corresponding to different stages of the disease and characterize the disease transmission dynamics by the flow of individuals through compartments. Agent-based modeling approaches use computer simulations to study the dynamic interactions among the agents (e.g. people in epidemiology) and between an agent and the environment. AI-based modeling approaches usually combine time series, clustering, and forecasting, resulting in an exemplary predictive performance. Debate among researchers has grown over model performance evaluation and selection of the best model for a certain feature (cases, deaths, etc.), a particular regional level (county, state, country, etc.), and other parameters. Fair evaluation and comparison of the output of different forecasting methods have remained elusive [24] since models vary in their complexity and the variables and parameters that characterize the dynamic states of a system.

Although the literature has compared predictive models for infectious diseases, to our best knowledge, existing work does not systematically compare performances, specifically with the same amount of *a priori* available information. We calibrate stochastic variants of six different growth models (i.e. logistic, generalized logistic, Richards, generalized Richards, Bertalanffy, and Gompertz) and the standard SIR model. All models can be included using an ordinary differential equation (ODE) into one flexible Bayesian modeling framework. We limited the analysis to these two modeling approaches because both not only produce good short and long-term forecasts, but also provide useful insights in the disease dynamics of COVID-19. The growth models provide an empirical approach without a specific theory on the mechanisms giving rise to the observed patterns in the cumulative infection data, while the compartmental models incorporate key mechanisms involved in the disease transmission dynamics that explain patterns in the observed data.

In our Bayesian modeling framework, the bottom-level is represented by a negative binomial model that directly models infection count data and accounts for the over-dispersed observational errors. The top-level is derived from a choice of growth or compartmental models that characterize certain disease transmission dynamics through ODE(s). The Markov chain Monte Carlo (MCMC) algorithm samples from the posterior distribution. The short-term forecasts derive from the resulting MCMC samples. We perform the rolling-origin cross-validation procedure to compare the prediction error of different stochastic models. We used the 20 countries with the most confirmed case numbers for a country-level analysis. Observations included that 1) as the models learned more, the predictive performance improved in general for all regions; 2) none of the models proved to be a gold standard across all the regions; and 3) the ARIMA model underperformed all stochastic models proposed in the paper. We designed a graphical interface that allows users to interact with future COVID-19 trends at different geographic locations in the U.S. based on real-time COVID-19 data. This web portal is updated daily and used to inform local policy-makers and the general public (<https://qiwei.shinyapps.io/PredictCOVID19/> with **Biotoools ID: bayesepimodels\_webapp** and **RRID: SCR\_019292**).

## Data Description

Let  $C = (C_1, \dots, C_T)$  be a sequence of cumulative confirmed case numbers observed at  $T$  successive equally spaced points in time (e.g. day) in a specific region, where each entry  $C_t \in \mathbb{N}$  for  $t = 1, \dots, T$ . Further let  $C_0$  be the initial value and  $\dot{C} = (\dot{C}_1, \dots, \dot{C}_T)$  be the lag one difference of  $C$ , where  $\dot{C}_1 = C_1 - C_0$  and each following entry  $\dot{C}_t = C_t - C_{t-1}$ ,  $t = 2, \dots, T$ , i.e. the difference between two adjacent observations. In the analysis and modeling of a series of reported infectious disease daily data, the time-series data could also be the cumulative death numbers, recovery case numbers, or their sums, denoted by  $D$  (Death),  $E$  (Recovery), and  $R$  (Removed), and their corresponding new case numbers, denoted by  $\dot{D}$ ,  $\dot{E}$ , and  $\dot{R}$ . Assuming a closed population with size  $N$ , the time-series data could also be the number of susceptible people, denoted by  $S$ , with each entry  $S_t = N - C_t$ . In reality, only confirmed cases and deaths are reported in most regions. Recovery data are not available or suffer from under-reporting issues if available. Thus, our main goal was to make predictions of the future trend of an infectious diseases only based on the daily confirmed cases  $\dot{C}$ .

## Analysis

In this section, we discuss the findings of our COVID-19 data analysis. We first implemented each of the growth models listed in Table 1 and the standard SIR model under the proposed Bayesian framework for the 20 countries with the most confirmed COVID-19 case numbers as of August 22, 2020. Input data were the sequence of daily confirmed cases  $\dot{C}$  only, which were accessible from the Johns Hopkins University Center for Systems Science and Engineering COVID-19 Data Repository (<https://github.com/CSSEGISandData/COVID-19/>). Several recent COVID-19 studies also based their analyses on this resource [see e.g. 25, 26, 27]. For our MCMC algorithms, we set 100,000 iterations with the first half as burn in and chose weakly informative priors. We present numerical and graphical summaries for posterior inference and short-term forecasting. Our final goal was to compare the predictive performance of all models using ARIMA as a benchmark model.

### Forecasting of daily confirmed cases in the U.S.

We first present the forecasting of U.S. daily confirmed cases made by the ARIMA model and our Bayesian framework with the choices of a GRC or SIR model. As seen in Figures 1, the GRC model demonstrates a downwards trend, the SIR model displays an upward trend, while the ARIMA model predicts a flat trajectory of daily predicted cases. A natural epidemiological interest is the estimated final size and end date of an epidemic. Growth models include a model parameter  $K$  that estimates the final epidemic size. For the SIR model, there is no available parameter that estimates the final size. Hence, the final case count is approximated as the predictive mean that converges to a specific value from the related MCMC samples. We applied a similar strategy to obtain the predicted mean of the final case counts using the ARIMA model [2]. The estimated cumulative confirmed cases by the end of 2020 were projected at 13.1, 106.1, and 10.0 (in millions), fitting the GRC, SIR, and ARIMA models, respectively. Assuming that the epidemic continues until the end of 2021, the final epidemic sizes are predicted to be 13.4, 187.3, and 22.0 (in millions) by the three models, respectively. To account for the discrepancies in forecasts and validate the forecast with actual reported figures, there is a need for an appropriate strategy to evaluate and compare the predictive performance of the concerned models.

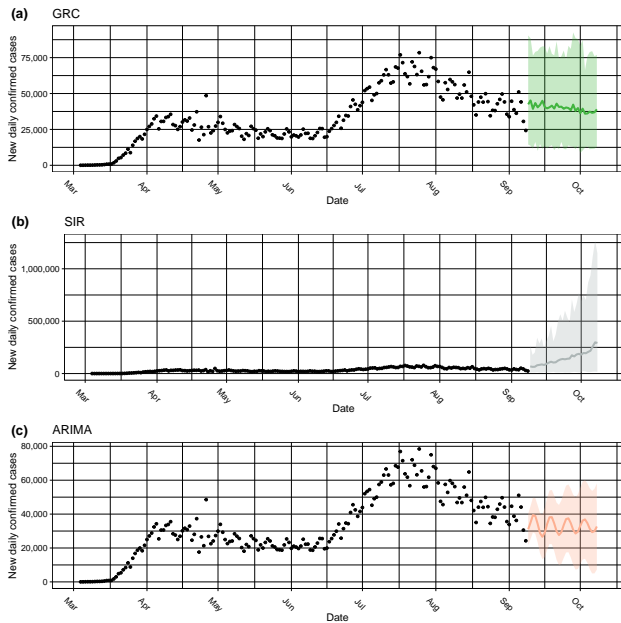

**Figure 1.** The one-month forecasting of new daily confirmed COVID-19 cases in the U.S. made by the (a) GRC and (b) SIR model under the proposed Bayesian framework, as well as the benchmark (c) ARIMA model. The black circles represent the observed COVID-19 case numbers since early March, 2020, while the colored circles and ribbons represent the predicted means and 95% prediction intervals, respectively.

### Model comparison through rolling-origin cross-validation

Cross-validation (CV) is a resampling procedure used to evaluate regression and classification models when only a limited data sample is available. The procedure randomly splits all data samples into two parts: training and testing sets, where the former is used to fit a model and the latter is used to evaluate the model's prediction performance in terms of certain error measures. The key assumption of CV is that all data points should be independent and identically distributed (i.i.d.). Unfortunately, time-series data are serially auto-correlated meaning that the observations are dependent on the time they were recorded. To circumvent this issue, the rolling-origin CV (ROCV) technique was proposed [28]. It splits the data into training and testing sets without affecting the i.i.d. assumption. We used an adaption of this method to evaluate the short-term forecasting performance among different top-level choices under the proposed Bayesian framework and ARIMA. Figure 2 shows the ROCV representation for an example of time-series data ( $T = 17$ ). **Algorithm 1** summarizes this evaluation procedure. The choice of initial training sample size (denoted by  $k$ ) was set to seven days to evaluate how well the models are able to generate forecasts during the initial phase of the pandemic, while the testing sample size (denoted by  $\omega$ ) was chosen to be three days to meet with our objective of comparing short-term forecasting performance. We defined the first day  $t = 1$  as the date when cumulative confirmed case load per country reached 100, resulting in different days for different countries.

A CV algorithm requires a predictive error metric that can quantify model performance in terms of forecasting accuracy. *Root mean square error* (RMSE) and *mean absolute deviations* (MAD) are candidates for error measures for out-of-bag predictions but are dependent on scale. Thus, large values may influence the errors to be larger. *Mean absolute percentage error* (MAPE) has been a widely used predictive measure due to its

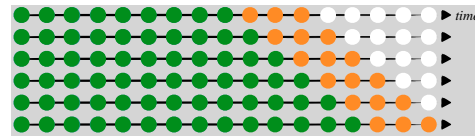

**Figure 2.** A visual guide to rolling-origin cross-validation (ROCV), where the total sample size  $T = 17$ , the initial training sample size is 9, and the testing sample size is 3. The green, orange, and white circles are training, testing, and unused samples in one CV iteration.

#### Algorithm 1 Rolling-origin cross-validation (ROCV)

- 1: Store the data starting day 1 to day  $T$
- 2: Initialize the number of initial training observations  $k$  ( $k = 7$ )
- 3: Set the size of the testing set  $\omega$  ( $\omega = 3$ )
- 4: **while**  $k + \omega \leq T$  **do**
- 5:   Learn the first  $k$  observations (green circles) as training data
- 6:   Hold out the next  $k + 1, \dots, k + \omega$  observations (orange circles) as the testing data
- 7:   Discard the remaining  $T - (k + \omega)$  observations (white circles)
- 8:   Compute an out-of-bag prediction error measure on the testing set (orange circles):

$$sMAPE = \frac{100\%}{\omega} \sum_{t=k+1}^{k+\omega} \left| \frac{C_t - \hat{C}_t}{(C_t + \hat{C}_t)/2} \right|,$$

where  $\hat{C}_t$  denotes the predicted cumulative cases at time point  $t$ .

- 9:    $k = k + 1$
- 10: **end while**

interpretability and its independence from scale, although the distribution of such percentage errors can be skewed if the data consist of values close to zero. Moreover, there is a possibility of this measure being undefined due to a zero in the denominator. **In addition, MAPE can be subjected to unbounded extreme values if the actual data points are close to zero or if the absolute forecasting error ( $C_t - \hat{C}_t$ ) is large. An improved percentage error metric, namely *symmetric mean absolute percentage error* (sMAPE), was proposed to address these issues [28]. This measure bounded the error between 0% - 200% by incorporating the mean of actual and predicted cases  $(C_t + \hat{C}_t)/2$  in the denominator. Values close to 0% result from accurate predictions, while errors close to 200% signify inaccurate forecasting.** This metric was considered in our analysis as it addressed the problem of having an unbounded measure and provided better symmetry and interpretability compared to MAPE.

Figure 3 displays the smoothed sMAPE curves generated by the ROCV across time for the 20 countries with the most confirmed case numbers as of August 22, 2020. All models performed poorly in the early stage, but as more data became available to be learned, the predictive performance gradually improved as the sMAPE dropped. The ARIMA and SIR models were performing significantly worse than the growth models in the early phase, which may be attributable to ARIMA (not having the growth specific parameters) being unable to detect the early growth. However, due to assumptions of a fixed transmission rate  $\gamma$  and under-reporting of data, SIR performed poorly. The stochastic growth curves were able to learn the epidemiological data trend in the initial phase with the help of the growth and scaling parameters. In latter half of the epidemic, all the models were performing equally well. Hence, we were unable to conclude that any one particular dominated the



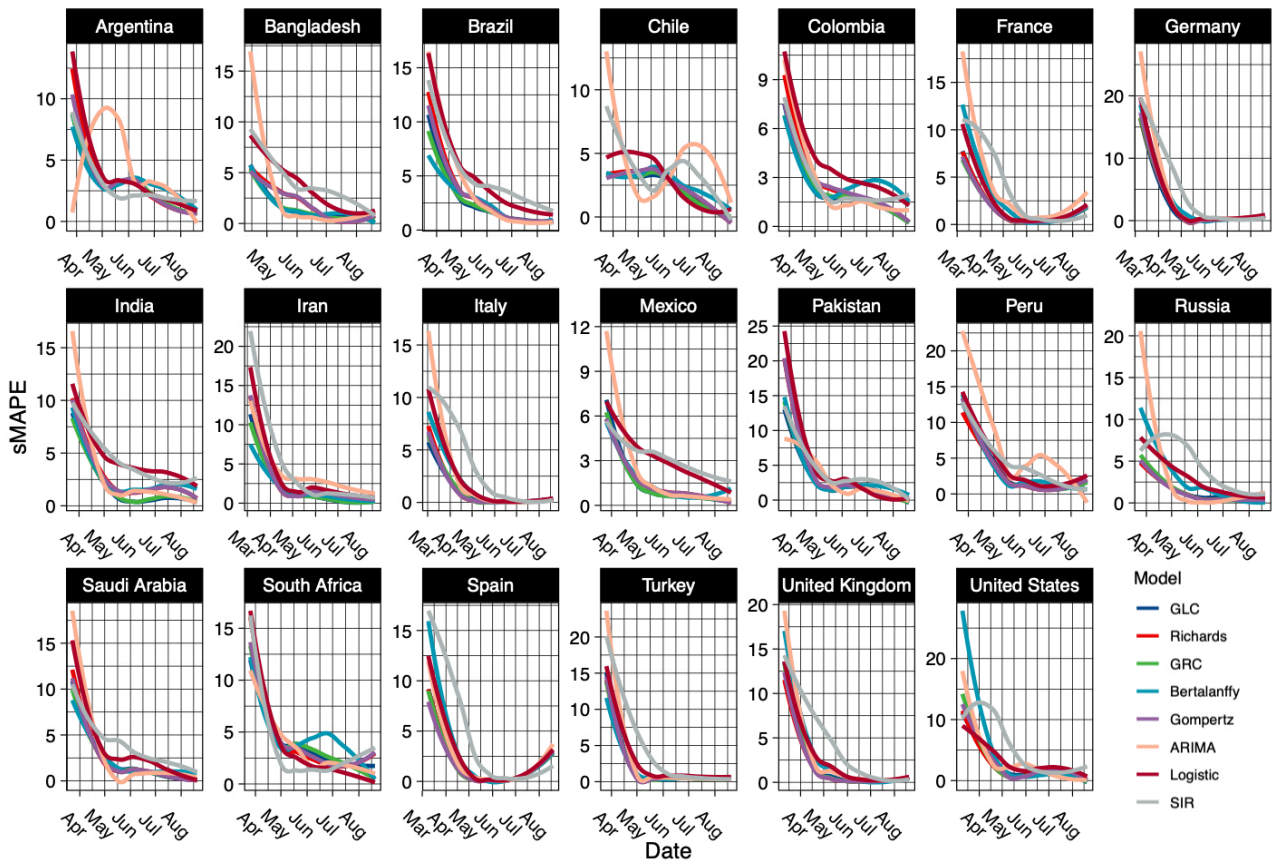

Figure 3. The smoothed sMAPE curves generated by the rolling-origin cross-validation (ROCV) over time for the 20 countries with the most confirmed COVID-19 case numbers as of August 22, 2020.

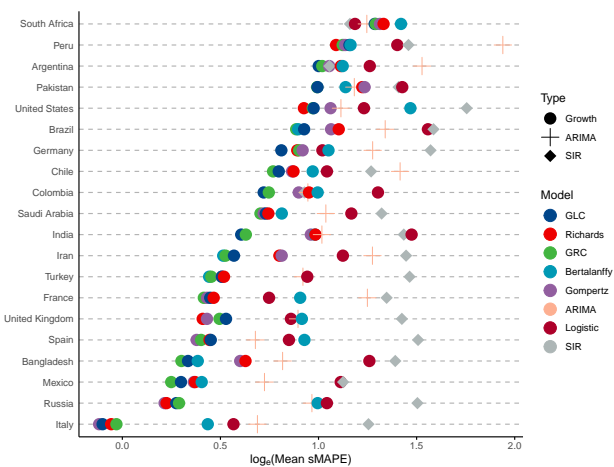

Figure 4. The Cleveland dot plot of the averaged sMAPE generated by the rolling-origin cross-validation (ROCV) for the 20 countries with the most confirmed COVID-19 case numbers as of August 22, 2020.

entire duration of the epidemic.

To answer the question if we could pick one model with best predictive performance on an average for any particular country, we constructed a Cleveland dot plot as shown in Figure 4 that allowed us to rank the model performance averaged over the entire pandemic by country. We arranged countries in ascending order of predictive performance.

## Discussion

We observed that all models performed best for Italy and worst for South Africa. The Richards model had the minimum averaged sMAPE for forecasting cumulative case counts in the U.S., while the GRC model had the lowest averaged sMAPE across seven countries followed by the GLC model with four. The SIR model was the best performer for South Africa. The Richards, Bertalanffy, and Gompertz models had a fair share of predictive dominance in the remaining countries. The ARIMA model performed below average across all countries.

The GRC and GLC models were consistent performers across all countries due to their ability to detect sub-exponential growth rates at an early stage of an epidemic. The inclusion of the scale parameter  $\alpha$  that could account for any asymmetry in the data allowed the GRC and Richards models to generally perform best in countries that did not have symmetric 'S'-shaped growth patterns and displayed randomness as well as multiple peaks. Countries including the U.S., Peru, Saudi Arabia, Iran, Turkey, and France displayed multiple peaks in the daily confirmed case counts. As a result, the Richards model performed the best in the U.S., United Kingdom, and Peru, while the GRC model dominated in the remaining countries with multiple peaks.

We observed a random structure in countries like Brazil, Chile, Bangladesh, and Mexico. The GRC was the most complex model and performed the best in these countries. However, the GLC model usually performed better in countries that had a single peak and an approximate 'S'-shaped curvature. The GLC model was able to generalize better than the GRC model when data were well structured and less random. Argentina, Pakistan, Germany, Colombia, and India had a single peak with-

out much randomness and the GLC model performed better in these countries. In South Africa, the usual growth models performed the worst due to a staggering growth rate in the initial and the middle phase of the epidemic. The SIR model performed the best out of the worst while the logistic model performed well due to its simplicity. The Gompertz model was the best performer in Russia, Spain, and Italy as it generalizes better than the other models.

## Conclusion

We developed a number of stochastic variants of growth and compartmental models in a unified Bayesian framework. The literature has discussed a theoretical comparison of growth models in great detail [5, 6, 7, 29, 30, 31, 32, 33]. However, to our best knowledge, no work systematically compares the performances among all as well as against a compartmental model such as the SIR model and a time-series forecasting model such as the ARIMA model.

We conclude that the proposed Bayesian framework not only allows room for interpretation but also offers an exemplary predictive performance when it comes to COVID-19 daily report data. Moreover, ARIMA (being a pure learning algorithm) is not able to match the forecasting accuracy of stochastic models. Further, the model parameters of ARIMA do not provide any information of epidemiological interests.

In the future, we aim to develop an ensemble model that can aggregate the prediction of each base model, resulting in one final prediction for the unseen data. Note that a group of researchers have recently introduced a GGM-GLM ensemble model [32] and compared forecasting performances with the individual models for the Ebola Forecasting Challenge [34]. The ensemble model outperformed the others under some circumstances. We also plan to perform long-term forecasting evaluation using epidemic features described in [24]. A sub-epidemic wave model that could detect multiple peaks in the data has been recently developed [35] and has the potential to improve forecasting performance.

An 'S'-shaped curvature on  $C$  attributes a simple growth model as it assumes that an epidemic would last only a short duration and that only a single peak would be observable on  $\hat{C}$ . This oversimplified assumption could be problematic as COVID-19 is more likely to be an endemic. Moreover, the changing government policies and public health guidelines as well as population behaviors (holiday) led to variable disease transmission rates, resulting in multiple peaks. Thus, developing stochastic growth models with the addition of a change-point detection mechanism to account for multiple peaks is worth investigating. We have demonstrated that an approach that combines a change-point detection model and a stochastic SIR model could significantly improve the short-term forecasting of the new daily confirmed cases [36]. To handle the sophisticated extensions of the current work, we need to utilize advanced versions of the Metropolis-Hastings (MH) algorithm in the MCMC algorithms. For example, the MH with delayed rejection [37], the combination of delayed rejection and adaptive Metropolis samplers [38], the multiple-try Metropolis [39, 40], and the methods discussed in Liang et al. [41].

## Potential Implications

The proposed Bayesian epidemiological models in a unified framework lay the foundation for an integrative approach to model and predict epidemiological data with tremendous accuracy and interpretability. Growth and compartmental models obtained as solutions to ordinary differential equations (ODEs)

are implemented to model epidemiological data under a deterministic setting as they provide a natural framework representative of such data types. However, the estimated model parameters crucial for providing insights into the nature of the epidemic are unreliable under the deterministic setting due to identifiability issues. The stochastic models mimic the structure of epidemiological models and incorporate parameter specific priors and measurement errors to solve the issues. Researchers can follow a similar setup to predict cases and deaths caused by an epidemic at any geographical level given the availability of data. Furthermore, the stochastic SIR model can be augmented by incorporating mobility, hospitalization, and recovery data resulting in better forecasts. This work also promotes an algorithmic strategy to measure forecasting performances of time series models in general.

On a much broader scale, this work encourages researchers to explore probabilistic approaches to model epidemiological data to develop computationally efficient algorithms that meet time and cost constraints.

## Methods

In this section, we present a bi-level Bayesian framework for predicting new confirmed cases during a pandemic in a closed society. The bottom level directly models the observed counts while accounting for measurement errors. Two alternatives for the top level are then introduced and characterizes the epidemic dynamics through growth curve or compartmental trajectories, respectively. Before introducing the main components, we summarize the possibly observable data.

### Bottom-level: Time-series count generating process

We consider the new case number observed at time  $t$ , i.e.  $\hat{C}_t$ , are sampled from a negative binomial (NB) model,

$$\hat{C}_t \sim \text{NB}(g(C_{t-1}, \Theta), \phi), \quad t = 2, \dots, T$$

as it automatically accounts for measurement errors and uncertainties associated with the counts. Here, we use  $\text{NB}(\mu, \phi)$ ,  $\mu, \phi > 0$  to denote a NB distribution with expectation  $\mu$  and dispersion  $1/\phi$ . We assume this stochastic process is a Markov process, where the present state (at time  $t$ ) depends only upon its previous state (at time  $t-1$ ). Therefore, the NB mean is a function, denoted by  $g(\cdot)$ , of the case number observed at time  $t-1$ , characterized by a set of interpretable/uninterpretable model parameters  $\Theta$ . With this parameterization, the NB variance is  $\mu + \mu^2/\phi$ , indicating that  $\phi$  controls the variance of measurement error. A small value leads to a large variance to mean ratio, while a large value approaching infinity reduces the NB model to a Poisson model with the same mean and variance. The probability mass function of a NB random variable  $Y$  is  $\frac{\Gamma(Y+\phi)}{Y!\Gamma(\phi)} \left(\frac{\phi}{\lambda+\phi}\right)^\phi \left(\frac{\lambda}{\lambda+\phi}\right)^Y$ . Thus, we can write the full data likelihood as

$$f(\hat{C}|\Theta, \phi) = \prod_{t=2}^T \frac{\Gamma(\hat{C}_t + \phi)}{\hat{C}_t! \Gamma(\phi)} \left( \frac{\phi}{g(C_{t-1}, \Theta) + \phi} \right)^\phi \left( \frac{g(C_{t-1}, \Theta)}{g(C_{t-1}, \Theta) + \phi} \right)^{\hat{C}_t} \quad (1)$$

For the prior distribution of the dispersion parameter  $\phi$ , we choose a gamma distribution,  $\phi \sim \text{Ga}(a_\phi, b_\phi)$ . We recommend small values, such as  $a_\phi = b_\phi = 0.001$ , for a non-informative setting [42]. Note that the proposed framework can be viewed as a stochastic discrete-time state-space model with a negative binomial error structure. The proposed Bayesian models,



on average, mimic the epidemic dynamics and are more flexible than those deterministic epidemiological models, as they account for measurement error and have the potential to incorporate existing information into the prior structure of  $\Theta$ .

### Top-level I: Growth model

We first discuss the choices of  $g(\cdot)$  when implementing growth models. The development of a variety of growth curves originates from population dynamics [43] and growth of biological systems [44, 45, 46, 47] modeling. A number of growth curves have been adapted in epidemiology for trend characterization and forecasting of an epidemic, such as the severe acute respiratory syndrome (SARS) [48, 49], dengue fever [50, 51], pandemic influenza A (H1N1) [52], Ebola virus disease (EVD) [29, 30], Zika fever [31], and COVID-19 [3, 6, 7, 53].

The underlying assumption is that the rate of growth of a population, organism, or infectious individuals eventually declines with size. The logistic curve (also known as sigmoid curve) is the simplest growth curve of continuous time  $u \in \mathbb{R}$ . It is a non-negative symmetric 'S'-shaped curve with equation  $y(u) = \frac{K}{1 + \exp(-\lambda(u - u_0))}$ , where  $u_0$  is the midpoint,  $K$  is the maximum value, and  $\lambda$  reflects the steepness of the curve. Clearly,  $y(u)$  approaches  $K$  when  $u \rightarrow \infty$ , while it converges to zero when  $u \rightarrow -\infty$ . In fact, the continuous curve  $y(u)$  is the solution of a first-order non-linear ODE,

$$\frac{dy(u)}{du} = \lambda y(u) \left(1 - \frac{y(u)}{K}\right)$$

with condition  $y(u_0) = K/2$ , where  $dy(u)/du$  can be interpreted as time-variant growth rate of the curve  $y$ . The above ODE reveals: 1) a non-negative growth rate,  $dy(u)/du > 0$  as  $y(u) \in [0, K]$ ; 2) an approximately exponential growth at the initial stage,  $y(u) \approx \exp(\lambda u)$  as  $dy(u)/du \approx \lambda y(u)$  when  $y(u) \rightarrow 0$ ; 3) no growth at the final stage,  $y(u) dy(u)/du = 0$  when  $y(u) \rightarrow K$ ; 4) a maximum growth rate of  $\lambda K/4$  occurred when  $y(u) = K/2$ , indicated by  $d^2y(u)/du^2 = \lambda dy(u)/du (1 - 2y(u)/K)$ . Based on those curve characteristics, we can use the growth curve to characterize the trend of cumulative confirmed cases  $C$ .

We mainly considered a family of growth curves that are derived from the generalized Richards curve (GRC), which is the solution to the following ODE,

$$\frac{dy(u)}{du} = \lambda y(u)^p \left[1 - \left(\frac{y(u)}{K}\right)^\alpha\right] \quad (2)$$

in continuous time  $u$ , while its discretized form at time point  $t$  is written as  $y_t - y_{t-1} = \lambda y_{t-1}^p [1 - (y_{t-1}/K)^\alpha]$ . For those model-specific parameters in the context of epidemiology,  $K$  is the final epidemic size and should be an integer in the range of  $(0, N]$ , where  $N$  is the total population,  $\lambda \in \mathbb{R}^+$  is the infectious rate at early epidemic stage,  $p \in (0, 1)$  is known as scaling of growth, and  $\alpha \in \mathbb{R}^+$  controls the curve symmetry. As our observed infectious disease data are usually counts collected at successive equally spaced discrete time points, we formulate the NB mean function  $g(\cdot)$  based on the discretized form of (2),

$$g(C_{t-1}, \Theta = \{K, \lambda, p, \alpha\}) = \lambda C_{t-1}^p \left[1 - \left(\frac{C_{t-1}}{K}\right)^\alpha\right]. \quad (3)$$

Table 1 provides a list of  $g(\cdot)$ 's for growth curves with their characteristics. All the listed growth curves have been utilized and discussed in previous epidemiological studies. We include all of those choices in our framework excluding the last one, which is based on the generalized growth curve (GGC), because

it lacks the final epidemic size  $K$  specification.

Without any existing information, we assume that  $K$  is from a discrete uniform distribution in its range and  $\gamma$  is from a gamma or a beta distribution, depending on the choice of growth curves. For example, for both logistic and Gompertz curves, we assume  $\gamma \sim \text{Beta}(a_\gamma, b_\gamma)$ , a natural modeling choice for parameter value restricted to the  $(0, 1)$  interval, and suggest to choose  $a_\gamma = b_\gamma = 1$  for a uniform setting; otherwise, we place a gamma prior, i.e.  $\gamma \sim \text{Ga}(a_\gamma = 0.001, b_\gamma = 0.001)$ . For the choice of GRC and generalized logistic curve (GLC), the prior of  $p$  is chosen to be  $\text{Beta}(a_p = 1, b_p = 1)$ . Lastly, we set  $\alpha \sim \text{Ga}(a_\alpha = 0.001, b_\alpha = 0.001)$  for fitting a GRC or Richards curve.

### Top-level II: Compartmental model

The susceptible-infected-removed (SIR) model was developed to simplify the mathematical modeling of human-to-human infectious diseases by Kermack and McKendrick [55]. It is a fundamental compartmental model in epidemiology. At any given time  $u$ , each individual in a closed population with size  $N$  is assigned to three distinctive compartments with labels: susceptible ( $S$ ), infectious ( $I$ ), or removed ( $R$ , being either recovered or dead). The standard SIR model describes the flow of people from  $S$  to  $I$  and then from  $I$  to  $R$  by the following set of nonlinear ODEs:

$$\begin{cases} \frac{dS(u)}{du} = -\beta S(u) \frac{I(u)}{N} \\ \frac{dI(u)}{du} = \beta S(u) \frac{I(u)}{N} - \gamma I(u) \\ \frac{dR(u)}{du} = \gamma I(u) \end{cases},$$

where  $S(u)$ ,  $I(u)$ , and  $R(u)$  are the population numbers of susceptible, infectious, and removed compartments measured in time  $u$ , subjecting to  $S(u) + I(u) + R(u) = N, \forall u$ . Another nature constraint is  $dS(u)/du + dI(u)/du + dR(u)/du = 0$ . Here,  $\beta \in \mathbb{R}^+$  is the disease transmission rate,  $\gamma \in \mathbb{R}^+$  is the removal rate, and their ratio  $\mathcal{R}_0 = \beta/\gamma$  is defined as the *basic reproductive number*. The rationale behind the first equation is that the number of new infections during an infinitesimal amount of time,  $-dS(u)/du$ , is equal to the number of susceptible people,  $S(u)$ , times the product of the contact rate,  $I(t)/N$ , and the disease transmission rate  $\beta$ . The third equation reflects that the infectious individuals leave the infectious population per unit time,  $dI(u)/du$ , as a rate of  $\gamma I(u)$ . The second equation follows immediately from the first and third equations as a result of  $dS(u)/du + dI(u)/du + dR(u)/du = 0$ . Assuming that only a small fraction of the population is infected or removed in the onset phase of an epidemic, we have  $S(u)/N \approx 1$  and thus the second equation reduces to  $dI(u)/du = (\beta - \gamma)I(u)$ , revealing that the infectious population is growing if and only if  $\beta > \gamma$ . As the expected lifetime of an infected case is given by  $\gamma^{-1}$ , the ratio  $\mathcal{R}_0 = \beta/\gamma$  is the average number of new infectious cases directly produced by an infected case in a completely susceptible population. The so-called basic reproductive number is a good indicator of an infectious disease's transmissibility.

We only consider the standard SIR model, although it is still feasible to design  $g(\cdot)$ 's from its variations (see a comprehensive summary [56]), such as the susceptible-infectious (SIS) model, the susceptible-infectious-recovered-deceased (SIRD) model, the susceptible-exposed-infectious-removed (SEIR) model, the susceptible-exposed-infectious-susceptible (SEIS) model, and their versions with the maternally-derived immunity compartment [57], as well as the recently developed extended-SIR (eSIR) model [14]. For modeling discrete time-series data, we use the discrete-time version of the standard

**Table 1.** List of  $g(\cdot)$ 's functions based on growth curves

| Models      | $g(C_{t-1}, \Theta)$                                                                              | Parameters $\Theta$                                                                                | Continuous curve $y(u)$                                                                                                 | Value at the turning point                       | Examples             |
|-------------|---------------------------------------------------------------------------------------------------|----------------------------------------------------------------------------------------------------|-------------------------------------------------------------------------------------------------------------------------|--------------------------------------------------|----------------------|
| GRC         | $\lambda C_{t-1}^p \left[ 1 - \left( \frac{C_{t-1}}{K} \right)^\alpha \right]$                    | $K \in \mathbb{N},$<br>$\lambda \in \mathbb{R}^+,$<br>$p \in (0, 1),$<br>$\alpha \in \mathbb{R}^+$ | N/A                                                                                                                     | $\left( \frac{p}{p+\alpha} \right)^{1/\alpha} K$ | [7, 29, 31]          |
| Richards    | $\lambda C_{t-1} \left[ 1 - \left( \frac{C_{t-1}}{K} \right)^\alpha \right]$                      | $K \in \mathbb{N},$<br>$\lambda \in \mathbb{R}^+,$<br>$\alpha \in \mathbb{R}^+$                    | $K (1 + A \exp(-\lambda \alpha u))^{-1/\alpha},$<br>where $A = -1 + \left( \frac{K}{y(0)} \right)^\alpha$               | $\left( \frac{1}{1+\alpha} \right)^{1/\alpha} K$ | [48, 49, 50, 51, 52] |
| GLC         | $\lambda C_{t-1}^p \left( 1 - \frac{C_{t-1}}{K} \right)$                                          | $K \in \mathbb{N},$<br>$\lambda \in \mathbb{R}^+,$<br>$p \in (0, 1)$                               | N/A                                                                                                                     | $\frac{p}{p+1} K$                                | [7, 35, 32, 33]      |
| Logistic    | $\lambda C_{t-1} \left( 1 - \frac{C_{t-1}}{K} \right)$                                            | $K \in \mathbb{N},$<br>$\lambda \in (0, 1)$                                                        | $K (1 + A \exp(-\lambda u))^{-1},$<br>where $A = -1 + \frac{K}{y(0)}$                                                   | $\frac{1}{2} K$                                  | [3, 6, 7, 29, 30]    |
| Bertalanffy | $\lambda C_{t-1}^{\frac{2}{3}} \left[ 1 - \left( \frac{C_{t-1}}{K} \right)^{\frac{1}{3}} \right]$ | $K \in \mathbb{N},$<br>$\lambda \in \mathbb{R}^+$                                                  | $K \left( 1 + A \exp(-\frac{1}{3} \gamma K^{-1/3} u) \right)^3,$<br>where $A = 1 - \left( \frac{y(0)}{K} \right)^{1/3}$ | $\frac{8}{27} K$                                 | [6]                  |
| Gompertz    | $\lambda C_{t-1} \log \frac{K}{C_{t-1}}$                                                          | $K \in \mathbb{N},$<br>$\lambda \in (0, 1)$                                                        | $K \exp(A \exp(-\lambda u)),$<br>where $A = \log \frac{y(0)}{K}$                                                        | $\frac{1}{e} K$                                  | [6]                  |
| GGC         | $\lambda C_{t-1}^p$                                                                               | $\lambda \in \mathbb{R}^+,$<br>$p \in (0, 1)$                                                      | $(A + \lambda u(1-p))^{1/(1-p)}$<br>where $A = y(0)^{1-p}$                                                              | N/A                                              | [7, 31, 32, 33, 54]  |

Abbreviations: GRC is generalized Richards curve; GLC is generalized logistic curve; GGC is generalized growth curve.

SIR model,

$$\begin{cases} \dot{S}_t &= -\beta S_{t-1} \frac{I_{t-1}}{N} \\ \dot{I}_t &= \beta S_{t-1} \frac{I_{t-1}}{N} - \gamma I_{t-1} \\ \dot{R}_t &= \gamma I_{t-1} \end{cases}, \quad (4)$$

where  $\dot{S}_t = S_t - S_{t-1}$ ,  $\dot{I}_t = I_t - I_{t-1}$ , and  $\dot{R}_t = R_t - R_{t-1}$  are the differences between two adjacent observations in the sequence of susceptible, infectious, and removed case numbers, respectively. The model has three trajectories, one for each compartment. The compositional nature of the three trajectories implies that we only need two of the three sequence data, e.g.  $S_t = N - C_t$  and  $R_t$  for  $t = 1, \dots, T$ . However, recovery data only exist in few regions and suffer from under-reporting issue even if they exist, which makes both model inference and predictions infeasible. Alternatively, we consider both of the removed and actively infectious cases as missing data and mimic their relationship in spirit to some compartmental models in epidemiology. Specifically, we assume the number of new removed cases at time  $t$ , i.e.  $\dot{R}_t$ , is sampled from a Poisson distribution with mean  $\gamma I_{t-1}$ , that is,  $\dot{R}_t \sim \text{Poi}(\gamma I_{t-1}) = \text{Poi}(\gamma(N - C_{t-1} - R_{t-1}))$ , where  $\gamma$  should be specified. Such a strategy but with different error structure was also considered in some other compartmental models in epidemiology [16, 58, 59]. We can estimate the value of  $\gamma$  from publicly available high-quality data where confirmed, deaths, and recovery cases are all well documented, or from prior epidemic studies due to the same under-reporting issue in actual data. In this paper, we choose the removal rate  $\gamma = 0.1$  as suggested by Pedersen and Meneghini [60] and Weitz et al. [61]. Based on this simplification, we rewrite the first equation in (4) as,

$$(N - C_t) - (N - C_{t-1}) = -\beta(N - C_{t-1}) \frac{N - C_{t-1} - R_{t-1}}{N},$$

resulting in

$$\dot{C}_t = \beta(N - C_{t-1}) \frac{N - C_{t-1} - R_{t-1}}{N}.$$

Thus, we formulate the NB mean function  $g(\cdot)$  for the standard SIR model as,

$$g(C_{t-1}, \Theta = \{\beta\} | R) = \beta(N - C_{t-1}) \frac{N - C_{t-1} - R_{t-1}}{N}, \quad (5)$$

where  $R$  can be sequentially inferred from  $C$ .

Without any existing information, in our Bayesian framework we assume  $\beta$  from a gamma distribution with hyperparameters that makes both the mean and variance of the transformed variable  $\mathcal{R}_0 = \beta/\gamma$  equal to 1, that is,  $\beta \sim \text{Ga}(1, 1/\gamma)$ .

## Model Fitting

In this section, we briefly describe the MCMC algorithm for posterior inference and forecasting. Our Bayesian inferential strategy allows us to simultaneously infer all model-specific parameters and quantify their uncertainties.

### MCMC algorithms

We first describe how to update the dispersion parameter  $\phi$  in the proposed Bayesian framework, as it does not depend on the choice of models. At each MCMC iteration, we perform the following step:

**Update of dispersion parameter  $\phi$ :** We update  $\phi$  by using a random walk Metropolis-Hastings (RWMH) algorithm. We first propose a new  $\phi^*$ , of which logarithmic value is generated from  $N(\log \phi, \tau_\phi^2)$  and then accept the proposed value  $\phi^*$  with

probability  $\min(1, m_{\text{MH}})$ , where the Hastings ratio is

$$m_{\text{MH}} = \frac{f(\dot{C}|\phi^*, \Theta) \pi(\phi^*) J(\phi \leftarrow \phi^*)}{f(\dot{C}|\phi, \Theta) \pi(\phi) J(\phi^* \leftarrow \phi)}.$$

Here we use  $J(\cdot \leftarrow \cdot)$  to denote the proposal probability distribution for the selected move. Note that the last term, which is the proposal density ratio, cancels out for this RWMH update.

#### Top-level as a growth model

We only present the updates of each parameters in the GRC model, as all other derivative models are its special cases. Our primary interest lies in the estimation of the final pandemic size  $K$  and the infectious rate at early epidemic stage  $\lambda$ .

**Update of final epidemic size parameter  $K$ :** We update  $K$  by using a RWMH algorithm. We first propose a new  $K^*$ , of which logarithmic value is generated from a truncated Poisson distribution  $\text{Poi}(\log K)$  within  $[\log C_T, \log N]$  and then accept the proposed value  $K^*$  with probability  $\min(1, m_{\text{MH}})$ , where the Hastings ratio is

$$m_{\text{MH}} = \frac{f(\dot{C}|\phi, K^*, \lambda, p, \alpha) \pi(K^*) J(K \leftarrow K^*)}{f(\dot{C}|\phi, K, \lambda, p, \alpha) \pi(K) J(K^* \leftarrow K)}.$$

Note that with a discrete uniform prior on  $K$ , the last two terms cancel out for this RWMH update.

**Update of infectious rate parameter  $\lambda$ :** We update  $\lambda$  by using a RWMH algorithm. We first propose a new  $\lambda^*$ , of which logarithmic value is generated from  $N(\log \lambda, \tau_\lambda^2)$  and then accept the proposed value  $\lambda^*$  with probability  $\min(1, m_{\text{MH}})$ , where the Hastings ratio is

$$m_{\text{MH}} = \frac{f(\dot{C}|\phi, K, \lambda^*, p, \alpha) \pi(\lambda^*) J(\lambda \leftarrow \lambda^*)}{f(\dot{C}|\phi, K, \lambda, p, \alpha) \pi(\lambda) J(\lambda^* \leftarrow \lambda)}.$$

Note that the last term, which is the proposal density ratio, cancels out for this RWMH update.

**Update of growth scaling parameter  $p$ :** We update  $p$  by using a RWMH algorithm. We first propose a new  $p^*$ , of which logarithmic value is generated from a truncated normal distribution  $N(\log p, \tau_p^2)$  within  $[-\infty, 0]$  and then accept the proposed value  $p^*$  with probability  $\min(1, m_{\text{MH}})$ , where the Hastings ratio is

$$m_{\text{MH}} = \frac{f(\dot{C}|\phi, K, \lambda, p^*, \alpha) \pi(p^*) J(p \leftarrow p^*)}{f(\dot{C}|\phi, K, \lambda, p, \alpha) \pi(p) J(p^* \leftarrow p)}.$$

Note that with a uniform prior on  $p$  over its range  $[0, 1]$ , the last two terms cancel out for this RWMH update.

**Update of symmetry parameter  $\alpha$ :** We update  $\alpha$  by using a RWMH algorithm. We first propose a new  $\alpha^*$ , of which logarithmic value is generated from  $N(\log \alpha, \tau_\alpha^2)$  and then accept the proposed value  $\alpha^*$  with probability  $\min(1, m_{\text{MH}})$ , where the Hastings ratio is

$$m_{\text{MH}} = \frac{f(\dot{C}|\phi, K, \lambda, p, \alpha^*) \pi(\alpha^*) J(\alpha \leftarrow \alpha^*)}{f(\dot{C}|\phi, K, \lambda, p, \alpha) \pi(\alpha) J(\alpha^* \leftarrow \alpha)}.$$

Note that the last term, which is the proposal density ratio, cancels out for this RWMH update.

#### Top-level as a compartmental model

Our primary interest lies in the estimation of the reproductive number  $\mathcal{R}_0 = \beta/\gamma$ , which reflects the transmissibility of the disease. With our assumption that  $\gamma$  is given, we propose the following updates in each MCMC iterations.

**Generate  $R$  based on  $C$ :** We assume  $I_1 = C_1$ , i.e. all the confirmed cases are capable to pass the disease to all susceptible individuals in a closed population at the very beginning. In other words,  $R_1 = 0$ . Then we sample  $\dot{R}_2 \sim \text{Poi}(\gamma I_1)$ , where  $\gamma$  is a pre-specified tuning parameter and  $\dot{R}_2 = R_2 - R_1$  ( $\dot{R}_2 = R_2$  here in that  $R_1 = 0$ ) is the new removed case numbers at time  $t = 2$ . Due to the compositional nature, we can compute  $I_2 = I_1 + \dot{C}_2 - \dot{R}_2$ , where  $\dot{C}_2 = C_2 - C_1$  is the new confirmed case numbers at time  $t = 2$ . Next, we repeat this process of sampling  $\dot{R}_t \sim \text{Poi}(\gamma I_{t-1})$  and computing  $I_t = I_{t-1} + \dot{C}_t - \dot{R}_t$ ,  $t = 3, \dots, T$ , to generate the sequence  $R$ .

**Update of reproduction number parameter  $\beta$ :** We update  $\beta$  by using a RWMH algorithm. We first propose a new  $\beta^*$ , of which logarithmic value is generated from a truncated normal distribution  $N(\log \beta, \tau_\beta^2)$  and then accept the proposed value  $\beta^*$  with probability  $\min(1, m_{\text{MH}})$ , where the Hastings ratio is

$$m_{\text{MH}} = \frac{f(\dot{C}|\beta^*, R) \pi(\beta^*) J(\beta \leftarrow \beta^*)}{f(\dot{C}|\beta, R) \pi(\beta) J(\beta^* \leftarrow \beta)}.$$

Note that the last term, which is the proposal density ratio, cancels out for this RWMH update.

#### Posterior inference

We obtain posterior inference by post-processing the MCMC samples after burn-in. Suppose that a sequence of MCMC samples on  $\theta$ ,  $\theta \in \{\phi, K, \lambda, p, \alpha, \beta\}$ ,

$$\theta^{(1)}, \dots, \theta^{(U)}$$

has been collected, where  $u, u = 1, \dots, U$  indexes the iteration after burn-in. An approximate Bayesian estimator of each parameter can be obtained simply by averaging over the samples,  $\hat{\theta} = \sum_{u=1}^U \theta^{(u)} / U$ . In addition to that, a quantile estimation or credible interval for each parameter of interest can be obtained from this sequence as well.

#### Forecasting

Based on the sequences of MCMC samples on  $K, \lambda, p$ , and  $\alpha$  in the growth model or  $\beta$  in the compartmental model, we can predict the cumulative or new confirmed cases at any future time  $T_f$  by Monte Carlo simulation. Particularly, from time  $T+1$  to  $T_f$ , we sequentially generate

$$\dot{C}_t^{(u)} \sim \text{NB}(g(C_{t-1}, \Theta^{(u)}), \phi^{(u)}), \quad t = T+1, \dots, T_f. \quad (6)$$

Then, both short and long-term forecast can be made by summarizing the  $(T_f - T)$ -by- $U$  matrix of MCMC samples. For example, the mean predictive number of cumulative and new confirmed cases at time  $T+1$  are  $\sum_{u=1}^U C_{T+1}^{(u)} / U$  and  $\sum_{u=1}^U \dot{C}_{T+1}^{(u)} / U$ , respectively.

#### Software

This paper introduces a user-friendly interactive web application (<https://qiwei.shinyapps.io/PredictCOVID19/> with **Biotools ID: bayesepimodels\_webapp** and **RRID: SCR\_019292**) integrated with R Shiny package. Shiny is a web platform that allows users to interact with real-time data and use a myriad of visualization tools to analyze them. The web application has been developed to help the general public assess both short and long-term forecasts of COVID-19 across the U.S. at both state and metropolitan level. The numbers of cumula-

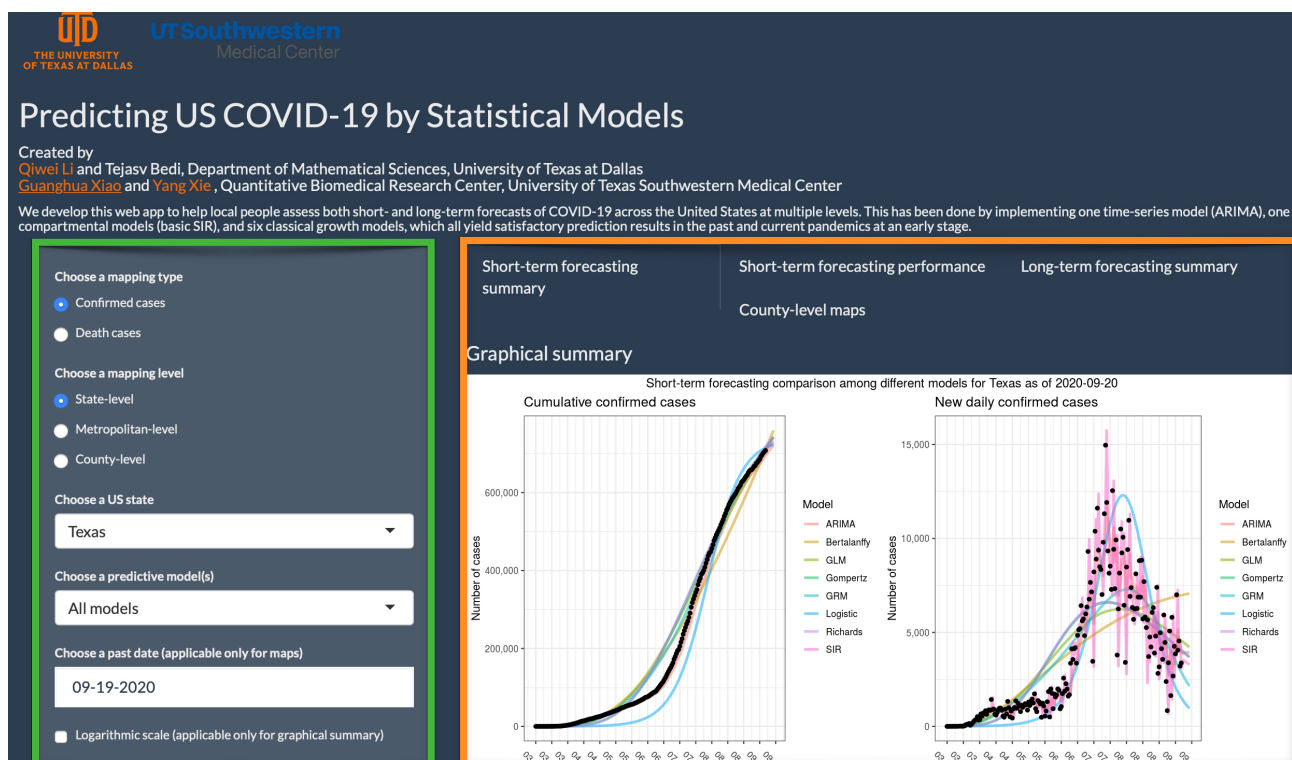

**Figure 5.** The web interface of the COVID-19 trend analysis page. The green box highlights the input panel that allows users to choose different mapping types and levels for a region. The orange box highlights the visualizations for short-term forecasting as per the instructions of users. Other tabs offer different graphs for summarizing the model performance, long-term forecasting, and county-level spatial maps.

tive or new daily confirmed cases as well as deaths are projected by different growth models and the SIR model under the proposed Bayesian framework. Alongside the numerical summaries, users can view and interpret the trends that cover the same information. To validate the short-term forecasting, numerical and graphical summaries of MAE and MAPE of the predictions are provided for the more advanced users. Moving on to the long-term forecasting, the models estimate the peak number of cases and deaths as well as their respective dates. Moreover, predictive estimates for the final size and date are also offered. Finally, for the users keen on visualizing the currently observed cases at a geographical level, the website offers county-level spatial maps.

### Availability of source code and requirements

- Project name: BayesEpiModels
- Project home page: <https://github.com/liqiwei2000/BayesEpiModels>
- Operating system(s): Windows and Linux
- Programming language: R (version 3.6.0.)
- Other requirements: Not applicable.
- License: GNU General Public License v3.0
- Biotools ID: [bayesepimodels](#)
- RRID: [SCR\\_019291](#)

### Availability of supporting data and materials

The related R/C++ codes for model preparation and execution are available on GitHub at <https://github.com/liqiwei2000/BayesEpiModels>. The R Shiny web application is available for users at <https://qiwei.shinyapps.io/PredictCOVID19/>. The COVID-19 data repository is operated by the Johns Hopkins

University Center for Systems Science and Engineering (JHU CSSE) and is freely available on GitHub at <https://github.com/CSSEGISandData/COVID-19/>.

### List of abbreviations

AI: Artificial Intelligence, ARIMA: Autoregressive integrated moving average, COVID-19: Coronavirus disease - 2019, CV: Cross-validation, eSIR: extended susceptible-infectious-removed, GGC: Generalized growth curve, GGM-GLM: Generalized growth model - Generalized logistic model, GLC: Generalized logistic curve, GRC: Generalized Richards curve, i.i.d.: independent and identically distributed, JHUCSSE: Johns Hopkins University Center for Systems Science and Engineering, MAD: Mean absolute deviations, MAPE: Mean absolute percentage error, MCMC: Markov chain Monte Carlo, NB: Negative Binomial, ODE: Ordinary differential equation, RMSE: Root mean square error, ROCV: Rolling-origin cross-validation, RWMH: Random walk Metropolis-Hastings, SARS-Cov-2: Severe acute respiratory syndrome coronavirus 2, SEIR: susceptible-exposed-infectious-removed, SEIS: susceptible-exposed-infectious-susceptible, SIR: susceptible-infectious-removed, SIRD: susceptible-infectious-recovered-deceased, SIS: susceptible-infectious-susceptible, sMAPE: symmetric Mean Absolute Percentage Error, U.S.: United States.

### Ethical Approval

Not applicable.

### Consent for publication

Not applicable.



## Competing Interests

The authors declare that they have no competing interests.

## Funding

This work was supported by the University of Texas at Dallas (UT Dallas) Office of Research [UT Dallas Center for Disease Dynamics and Statistics] and partially supported by the National Institutes of Health [R35GM136375, P30CA142543, 5R01CA152301, P50CA70907, 1R01GM115473]; and the Cancer Prevention and Research Institute of Texas [RP190107, RP180805].

## Author's Contributions

QL has developed the Bayesian framework, designed the MCMC algorithms, and constructed the R `Shiny` web application. QL and TB have contributed to the review of different methods and collaborated in the real data analysis. QL, CL, GX, and YX have conceived the study and supervised the web application development and the statistical analyses. All authors have contributed to the writing of the manuscript. All authors have read and approved the final manuscript.

## Acknowledgements

The authors would like to thank Drs. Swati Biswas, Min Chen, Pankaj Choudhary, and Vladimir Dragovic in the Department of Mathematical Sciences at the University of Texas at Dallas for their support and valuable suggestions on this work.

## References

1. Elmousalimi HH, Hassanien AE. Day level forecasting for Coronavirus Disease (COVID-19) spread: analysis, modeling and recommendations. *arXiv preprint arXiv:200307778* 2020;.
2. Perone G. An ARIMA model to forecast the spread and the final size of COVID-2019 epidemic in Italy. *medRxiv* 2020;.
3. Batista M. Estimation of the final size of the COVID-19 epidemic. *medRxiv doi* 2020;10:16–20023606.
4. COVID I, Murray CJ, et al. Forecasting COVID-19 impact on hospital bed-days, ICU-days, ventilator-days and deaths by US state in the next 4 months. *medRxiv* 2020;.
5. Roosa K, Lee Y, Luo R, Kirpich A, Rothenberg R, Hyman J, et al. Real-time forecasts of the COVID-19 epidemic in China from February 5th to February 24th, 2020. *Infectious Disease Modelling* 2020;5:256–263.
6. Jia L, Li K, Jiang Y, Guo X, et al. Prediction and analysis of Coronavirus Disease 2019. *arXiv preprint arXiv:200305447* 2020;.
7. Wu K, Darcet D, Wang Q, Sornette D. Generalized logistic growth modeling of the COVID-19 outbreak in 29 provinces in China and in the rest of the world. *arXiv preprint arXiv:200305681* 2020;.
8. Fanelli D, Piazza F. Analysis and forecast of COVID-19 spreading in China, Italy and France. *Chaos, Solitons & Fractals* 2020;134:109761.
9. Kucharski AJ, Russell TW, Diamond C, Liu Y, Edmunds J, Funk S, et al. Early dynamics of transmission and control of COVID-19: A mathematical modelling study. *The Lancet Infectious Diseases* 2020;.
10. Li R, Pei S, Chen B, Song Y, Zhang T, Yang W, et al. Substantial undocumented infection facilitates the rapid dissemination of novel coronavirus (SARS-CoV-2). *Science* 2020;368(6490):489–493.
11. Liu Z, Magal P, Seydi O, Webb G. Predicting the cumulative number of cases for the COVID-19 epidemic in China from early data. *arXiv preprint arXiv:200212298* 2020;.
12. Pan A, Liu L, Wang C, Guo H, Hao X, Wang Q, et al. Association of public health interventions with the epidemiology of the COVID-19 outbreak in Wuhan, China. *Journal of American Medical Association* 2020;323(19):1915–1923.
13. Pei S, Shaman J. Initial Simulation of SARS-CoV2 Spread and Intervention Effects in the Continental US. *medRxiv* 2020;.
14. Song PX, Wang L, Zhou Y, He J, Zhu B, Wang F, et al. An epidemiological forecast model and software assessing interventions on COVID-19 epidemic in China. *medRxiv* 2020;.
15. Sun H, Qiu Y, Yan H, Huang Y, Zhu Y, Chen SX. Tracking and predicting COVID-19 epidemic in China Mainland. *medRxiv* 2020;.
16. Wang L, Wang G, Gao L, Li X, Yu S, Kim M, et al. Spatiotemporal dynamics, nowcasting and forecasting of COVID-19 in the United States. *arXiv preprint arXiv:200414103* 2020;.
17. Yamana T, Pei S, Shaman J. Projection of COVID-19 Cases and Deaths in the US as Individual States Re-open May 4, 2020. *medRxiv* 2020;.
18. Yang Z, Zeng Z, Wang K, Wong SS, Liang W, Zanin M, et al. Modified SEIR and AI prediction of the epidemics trend of COVID-19 in China under public health interventions. *Journal of Thoracic Disease* 2020;12(3):165.
19. Gomez J, Prieto J, Leon E, Rodriguez A. INFEKTA: A General Agent-based Model for Transmission of Infectious Diseases: Studying the COVID-19 Propagation in Bogotá-Colombia. *medRxiv* 2020;.
20. Bullock J, Pham KH, Lam CSN, Luengo-Oroz M, et al. Mapping the landscape of artificial intelligence applications against COVID-19. *arXiv preprint arXiv:200311336* 2020;.
21. Hu Z, Ge Q, Jin L, Xiong M. Artificial intelligence forecasting of COVID-19 in China. *arXiv preprint arXiv:200207112* 2020;.
22. Distanto C, Pereira IG, Goncalves LMG, Piscitelli P, Miani A. Forecasting COVID-19 Outbreak Progression in Italian Regions: A model based on neural network training from Chinese data. *medRxiv* 2020;.
23. Vaishya R, Javaid M, Khan IH, Haleem A. Artificial Intelligence (AI) applications for COVID-19 pandemic. *Diabetes & Metabolic Syndrome: Clinical Research & Reviews* 2020;.
24. Tabataba FS, Chakraborty P, Ramakrishnan N, Venkatramanan S, Chen J, Lewis B, et al. A framework for evaluating epidemic forecasts. *BMC Infectious Diseases* 2017;17(1):345.
25. Dong E, Du H, Gardner L. An interactive web-based dashboard to track COVID-19 in real time. *The Lancet Infectious Diseases* 2020;20(5):533–534.
26. Zhou T, Ji Y. Semiparametric Bayesian Inference for the Transmission Dynamics of COVID-19 with a State-Space Model. *arXiv preprint arXiv:200605581* 2020;.
27. Toda AA. Susceptible–infected–recovered (SIR) Dynamics of COVID-19 and Economic Impact. *arXiv preprint arXiv:200311221* 2020;.
28. Tashman L. Out-of sample tests of forecasting accuracy: A tutorial and review. *International Journal of Forecasting* 2000 01;16.
29. Chowell G, Simonsen L, Viboud C, Kuang Y. Is West Africa approaching a catastrophic phase or is the 2014 Ebola epidemic slowing down? Different models yield different answers for Liberia. *PLoS Currents* 2014;6.
30. Pell B, Kuang Y, Viboud C, Chowell G. Using phenomenological models for forecasting the 2015 Ebola challenge. *Epidemics* 2018;22:62–70.



31. Chowell G, Hincapie-Palacio D, Ospina J, Pell B, Tariq A, Dahal S, et al. Using phenomenological models to characterize transmissibility and forecast patterns and final burden of Zika epidemics. *PLoS Currents* 2016;8.
32. Chowell G, Luo R, Sun K, Roosa K, Tariq A, Viboud C. Real-time forecasting of epidemic trajectories using computational dynamic ensembles. *Epidemics* 2020;30:100379.
33. Chowell G. Fitting dynamic models to epidemic outbreaks with quantified uncertainty: A primer for parameter uncertainty, identifiability, and forecasts. *Infectious Disease Modelling* 2017;2(3):379–398.
34. Viboud C, Sun K, Gaffey R, Ajelli M, Fumanelli L, Merler S, et al. The RAPIDD ebola forecasting challenge: Synthesis and lessons learnt. *Epidemics* 2018;22:13–21.
35. Chowell G, Tariq A, Hyman JM. A novel sub-epidemic modeling framework for short-term forecasting epidemic waves. *BMC Medicine* 2019;17(1):164.
36. Jiang S, Zhou Q, Zhan X, Li Q. BayesSMILES: Bayesian Segmentation Modeling for Longitudinal Epidemiological Studies. *medRxiv* 2020; <https://www.medrxiv.org/content/early/2020/10/08/2020.10.06.20208132.1>.
37. Mira A, et al. On Metropolis-Hastings algorithms with delayed rejection. *Metron* 2001;59(3-4):231–241.
38. Haario H, Laine M, Mira A, Saksman E. DRAM: Efficient adaptive MCMC. *Statistics and Computing* 2006;16(4):339–354.
39. Liu JS, Liang F, Wong WH. The multiple-try method and local optimization in Metropolis sampling. *Journal of the American Statistical Association* 2000;95(449):121–134.
40. Martino L. A review of multiple try MCMC algorithms for signal processing. *Digital Signal Processing* 2018;75:134–152.
41. Liang F, Liu C, Carroll R, Advanced Markov chain Monte Carlo methods: Learning from past samples. John Wiley & Sons; 2011.
42. Gelman A, et al. Prior distributions for variance parameters in hierarchical models (comment on article by Browne and Draper). *Bayesian Analysis* 2006;1(3):515–534.
43. Haberman R. Mathematical models: Mechanical vibrations, population dynamics, and traffic flow. Society for Industrial and Applied Mathematics; 1998.
44. Werker A, Jaggard K. Modelling Asymmetrical Growth Curves that Rise and then Fall: Applications to Foliage Dynamics of Sugar Beet (*Beta vulgaris*L.). *Annals of Botany* 1997;79(6):657–665.
45. Desta F, Mac Siurtain M, Colbert J. Parameter estimation of nonlinear growth models in forestry. *Silv Fenn* 1999;33(4):327–336.
46. Kaps M, Herring W, Lamberson W. Genetic and environmental parameters for traits derived from the Brody growth curve and their relationships with weaning weight in Angus cattle. *Journal of Animal Science* 2000;78(6):1436–1442.
47. Topal M, Bolukbasi S. Comparison of nonlinear growth curve models in broiler chickens. *Journal of Applied Animal Research* 2008;34(2):149–152.
48. Hsieh YH, Lee JY, Chang HL. SARS epidemiology modeling. *Emerging Infectious Diseases* 2004;10(6):1165.
49. Hsieh YH. Richards model: A simple procedure for real-time prediction of outbreak severity. In: *Modeling and Dynamics of Infectious Diseases* World Scientific; 2009.p. 216–236.
50. Hsieh YH, Ma S. Intervention measures, turning point, and reproduction number for dengue, Singapore, 2005. *The American Journal of Tropical Medicine and Hygiene* 2009;80(1):66–71.
51. Hsieh YH, Chen C. Turning points, reproduction number, and impact of climatological events for multi-wave dengue outbreaks. *Tropical Medicine & International Health* 2009;14(6):628–638.
52. Hsieh YH. Pandemic influenza A (H1N1) during winter influenza season in the southern hemisphere. *Influenza and Other Respiratory Viruses* 2010;4(4):187–197.
53. Lee SY, Lei B, Mallick B. Estimation of COVID-19 spread curves integrating global data and borrowing information. *PLOS ONE* 2020 07;15(7):1–17. <https://doi.org/10.1371/journal.pone.0236860>.
54. Viboud C, Simonsen L, Chowell G. A generalized-growth model to characterize the early ascending phase of infectious disease outbreaks. *Epidemics* 2016;15:27–37.
55. Kermack WO, McKendrick AG. A contribution to the mathematical theory of epidemics. *Proceedings of the Royal Society of London Series A* 1927;115(772):700–721.
56. Bailey NT, et al. The mathematical theory of infectious diseases and its applications. Charles Griffin & Company Ltd, 5a Crenndon Street, High Wycombe, Bucks HP13 6LE.; 1975.
57. Hethcote HW. The mathematics of infectious diseases. *SIAM Review* 2000;42(4):599–653.
58. Siettos CI, Russo L. Mathematical modeling of infectious disease dynamics. *Virulence* 2013;4(4):295–306.
59. Anastassopoulou C, Russo L, Tsakris A, Siettos C. Data-based analysis, modelling and forecasting of the COVID-19 outbreak. *PloS One* 2020;15(3):e0230405.
60. Pedersen MG, Meneghini M. Quantifying undetected COVID-19 cases and effects of containment measures in Italy. *ResearchGate Preprint* (online 21 March 2020) DOI 2020;10.
61. Weitz JS, Beckett SJ, Coenen AR, Demory D, Dominguez-Mirazo M, Dushoff J, et al. Modeling shield immunity to reduce COVID-19 epidemic spread. *Nature Medicine* 2020;p. 1–6.

Your PDF file "main\_v4.pdf" cannot be opened and processed. Please see the common list of problems, and suggested resolutions below.

Reason:

Other Common Problems When Creating a PDF from a PDF file

-----

You will need to convert your PDF file to another format or fix the current PDF file, then re-submit it.



Click here to access/download  
**Supplementary Material**  
response\_letter.pdf



Supplement: giab009_giga-d-20-00328_revision_1.pdf [file giab009_giga-d-20-00328_revision_1.pdf]
