# Supplementary material
Source: PubMed Central journal article supplement (PMC7931815)
Supplement: giab009_reviewer_1_report_original_submission.pdf [file giab009_reviewer_1_report_original_submission.pdf]

## Reviewer Report

**Title: Evaluating Short-term Forecasting of COVID-19 Cases among Different Epidemiological Models under a Bayesian Framework**

**Version: Original Submission**    **Date: 11/26/2020**

**Reviewer name: Luca Martino**

### Reviewer Comments to Author:

The paper contains interesting material and its a good work.

This has also a value of brief survey. I like a lot Table 1.

I have some suggestions to improve its clarity and increase its impact. See below.

- Please, explain better the equation of sMAPE in Algorithm 1, defining all the variables ( $e_t$ , etc.).

- Please, discuss something regarding the possible discretization of Eqs. (2), (3) or (4).

Specifically, Eq. (4) seems still in continuous time since there are derivatives and not differences. Please, clarify this point.

- Regarding the MCMC and Metropolis part, in order to improve the state-of-the-art discussion, I suggest to discuss more sophisticated versions of the MH algorithm,

such as the Multiple Try Metropolis algorithms and adaptive MCMC schemes, e.g.,

L. Martino, "A Review of Multiple Try MCMC algorithms for Signal Processing", Digital Signal Processing, Volume 75, Pages: 134-152, 2018

A. Mira, On Metropolis-Hastings algorithms with delayed rejection, Metron, Vol. LIX (3-4) (2001) 231-241

H. Haario, M. Laine, A. Mira, E. Saksman, DRAM: efficient adaptive MCMC, Statistics and Computing 16 (4) (2006) 339-354.

F. Liang, C. Liu, R. Carroll, Advanced Markov Chain Monte Carlo Methods: Learning from Past Samples, Wiley Series in Computational Statistics, England, 2010

This discussion can increase the impact of the work (increasing the number of possible interested readers) and completes the survey value of the work.

### Methods

Are the methods appropriate to the aims of the study, are they well described, and are necessary controls included? Choose an item.

### Conclusions

Are the conclusions adequately supported by the data shown? Choose an item.

## Reporting Standards

Does the manuscript adhere to the journal's guidelines on [minimum standards of reporting?](#) Choose an item.

Choose an item.

## Statistics

Are you able to assess all statistics in the manuscript, including the appropriateness of statistical tests used? Choose an item.

## Quality of Written English

Please indicate the quality of language in the manuscript: Choose an item.

## Declaration of Competing Interests

Please complete a declaration of competing interests, considering the following questions:

- Have you in the past five years received reimbursements, fees, funding, or salary from an organisation that may in any way gain or lose financially from the publication of this manuscript, either now or in the future?
- Do you hold any stocks or shares in an organisation that may in any way gain or lose financially from the publication of this manuscript, either now or in the future?
- Do you hold or are you currently applying for any patents relating to the content of the manuscript?
- Have you received reimbursements, fees, funding, or salary from an organization that holds or has applied for patents relating to the content of the manuscript?
- Do you have any other financial competing interests?
- Do you have any non-financial competing interests in relation to this paper?

If you can answer no to all of the above, write 'I declare that I have no competing interests' below. If your reply is yes to any, please give details below.

There is no competing interests

I agree to the open peer review policy of the journal. I understand that my name will be included on my report to the authors and, if the manuscript is accepted for publication, my named report including any attachments I upload will be posted on the website along with the authors' responses. I agree for my report to be made available under an Open Access Creative Commons CC-BY license (<http://creativecommons.org/licenses/by/4.0/>). I understand that any comments which I do not wish to be included in my named report can be included as confidential comments to the editors, which will not be published.

Choose an item.

To further support our reviewers, we have joined with Publons, where you can gain additional credit to further highlight your hard work (see: <https://publons.com/journal/530/gigascience>). On publication of this paper, your review will be automatically added to Publons, you can then choose whether or not to claim your Publons credit. I understand this statement.

Yes Choose an item.
