# Supplementary material
Source: PubMed Central journal article supplement (PMC7931815)
Supplement: giab009_reviewer_2_report_original_submission.pdf [file giab009_reviewer_2_report_original_submission.pdf]

## Reviewer Report

**Title: Evaluating Short-term Forecasting of COVID-19 Cases among Different Epidemiological Models under a Bayesian Framework**

**Version: Original Submission**    **Date: 12/16/2020**

**Reviewer name: Vasileios Basios**

### Reviewer Comments to Author:

The authors present a solid case for forecasting of COVID-19 data. An important and challenging issue for decision makers in government, academia and medical establishments all over the world.

As such the paper merits publication as it might help the over all discussion in present times. Their predictive models and the discussion is enlightening and well within the standard classical approaches. Their exposition of calibration of stochastic growth models vis a vis and a generic, albeit not detailed, dynamical system approach of the standard SIR model as well as the Bayesian framework of choice for forecasting is not novel, but it holds some interest, nevertheless.

Rightfully they note that "none of the models proved to be golden standards across all the regions" and I should add also across time scales where definitely a second and possibly a third wave have already been observed to develop.

Although the authors briefly mention this in their paper I believe they should make it clearer why there is such a limitation for the models and their variants discussed herein.

The paper has also the extra merit of offering to the public the source code and the interface that the authors developed.

Which by its valiant virtue of being free and open source can accelerate winning this battle against the death-roll due to COVID-19 epidemic.

Well done and congratulations to the authors.

## Methods

Are the methods appropriate to the aims of the study, are they well described, and are necessary controls included? Choose an item.

## Conclusions

Are the conclusions adequately supported by the data shown? Choose an item.

## Reporting Standards

Does the manuscript adhere to the journal's guidelines on [minimum standards of reporting?](#) Choose an item.

Choose an item.

## Statistics

Are you able to assess all statistics in the manuscript, including the appropriateness of statistical tests used? Choose an item.

## Quality of Written English

Please indicate the quality of language in the manuscript: Choose an item.

## Declaration of Competing Interests

Please complete a declaration of competing interests, considering the following questions:

- Have you in the past five years received reimbursements, fees, funding, or salary from an organisation that may in any way gain or lose financially from the publication of this manuscript, either now or in the future?
- Do you hold any stocks or shares in an organisation that may in any way gain or lose financially from the publication of this manuscript, either now or in the future?
- Do you hold or are you currently applying for any patents relating to the content of the manuscript?
- Have you received reimbursements, fees, funding, or salary from an organization that holds or has applied for patents relating to the content of the manuscript?
- Do you have any other financial competing interests?
- Do you have any non-financial competing interests in relation to this paper?

If you can answer no to all of the above, write 'I declare that I have no competing interests' below. If your reply is yes to any, please give details below.

I declare that I have no competing interests.

I agree to the open peer review policy of the journal. I understand that my name will be included on my report to the authors and, if the manuscript is accepted for publication, my named report including any attachments I upload will be posted on the website along with the authors' responses. I agree for my report to be made available under an Open Access Creative Commons CC-BY license (<http://creativecommons.org/licenses/by/4.0/>). I understand that any comments which I do not wish to be included in my named report can be included as confidential comments to the editors, which will not be published.

Choose an item.

To further support our reviewers, we have joined with Publons, where you can gain additional credit to further highlight your hard work (see: <https://publons.com/journal/530/gigascience>). On publication of this paper, your review will be automatically added to Publons, you can then choose whether or not to claim your Publons credit. I understand this statement.

Yes Choose an item.
